# Supplementary material for: Role of NS1 and TLR3 in Pathogenesis and Immunity of WNV
Source: MDPI journal article supplement (doi:10.3390/v11070603), 2019-07-03
Supplement: s1 [file s1]

Normal Brain

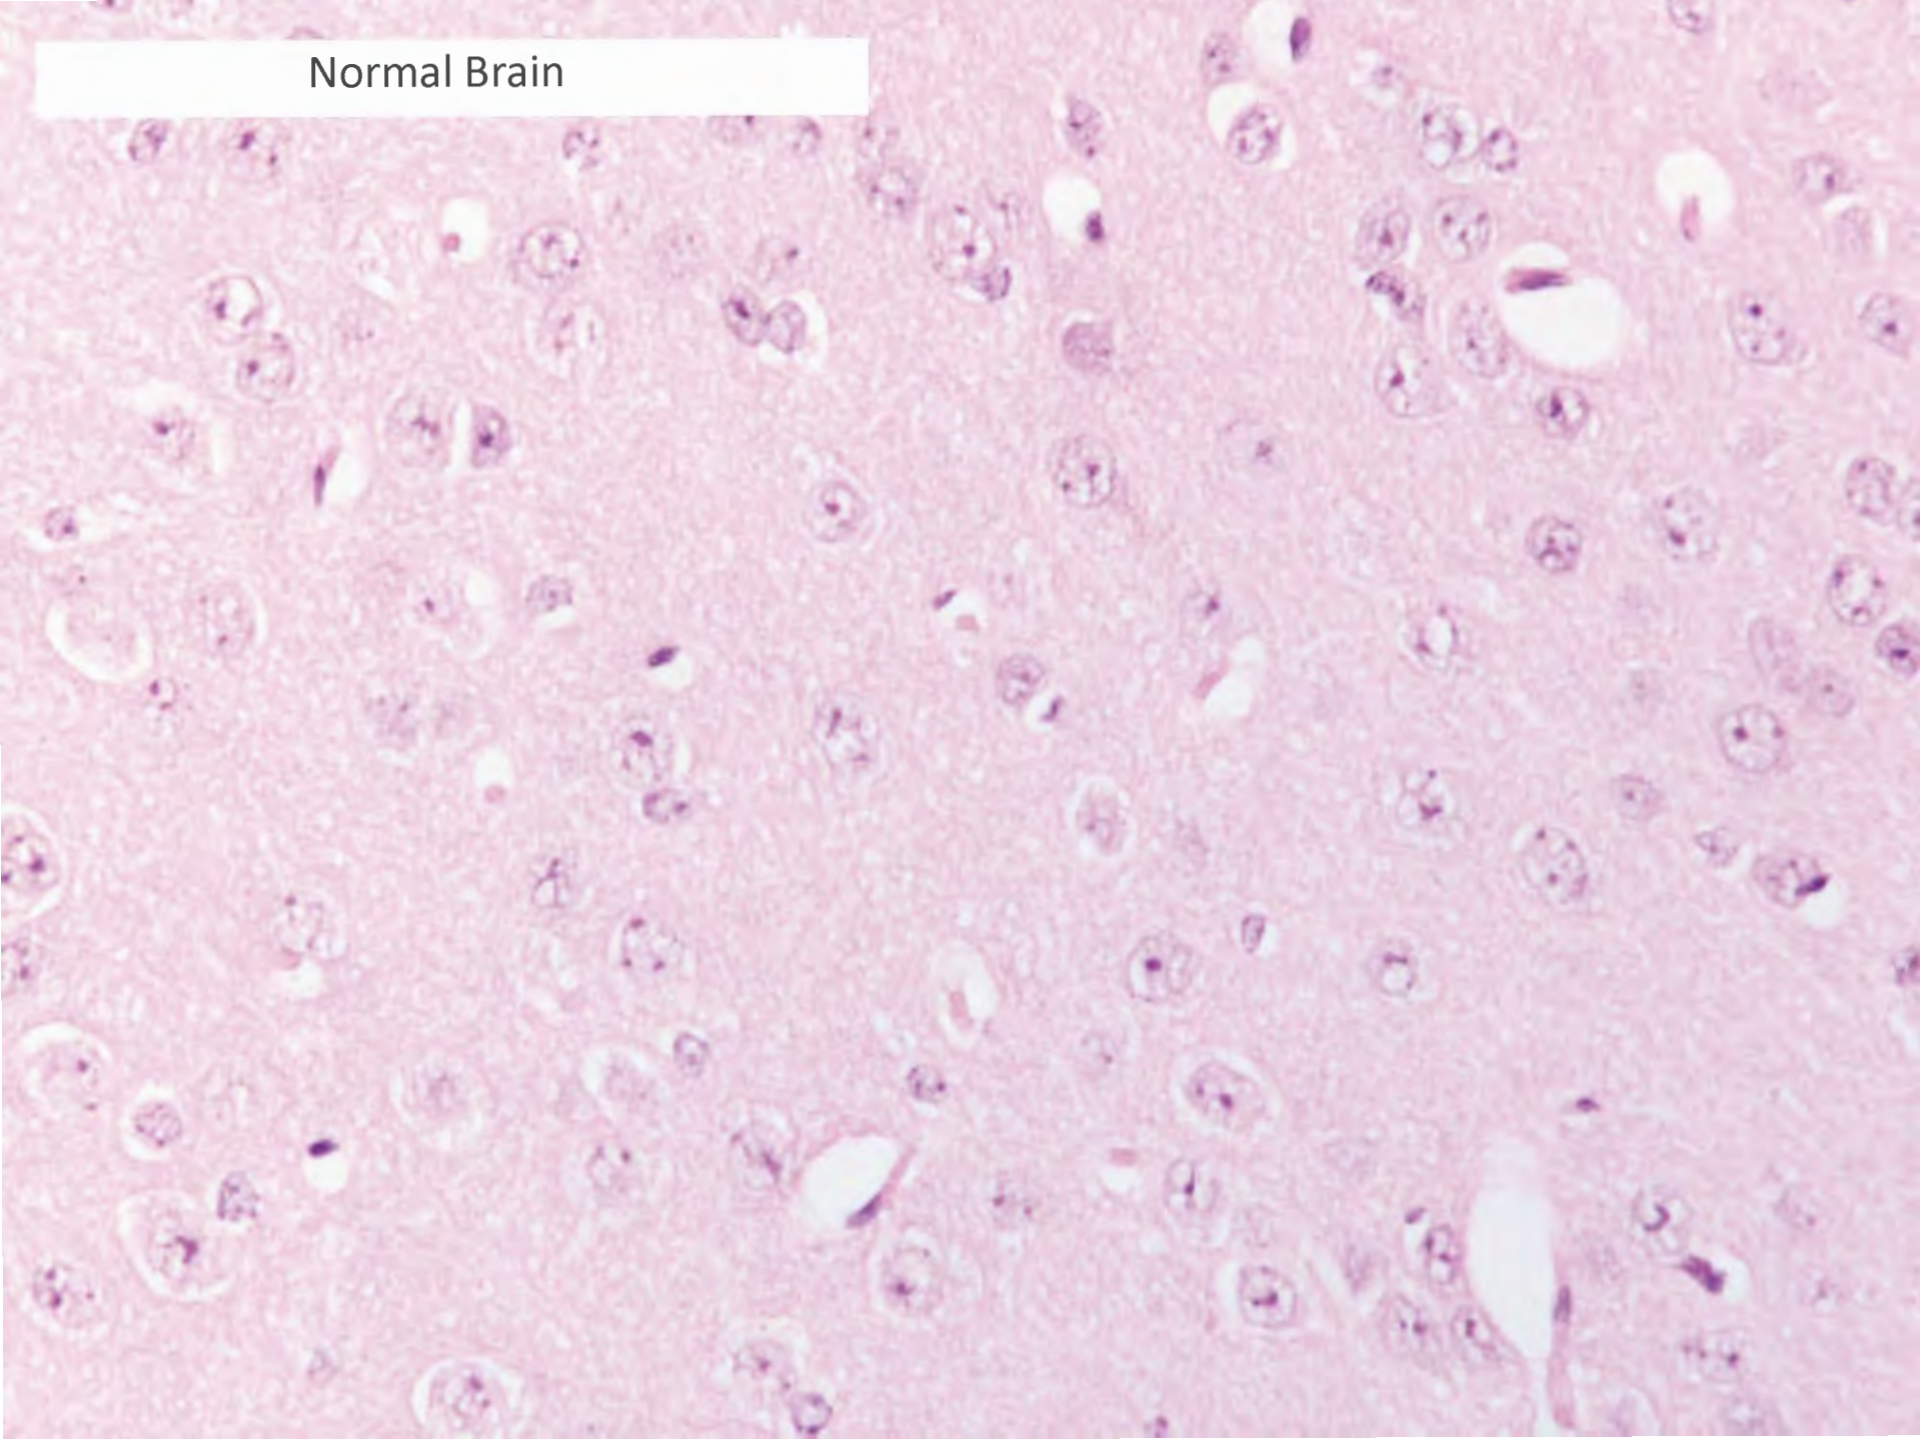



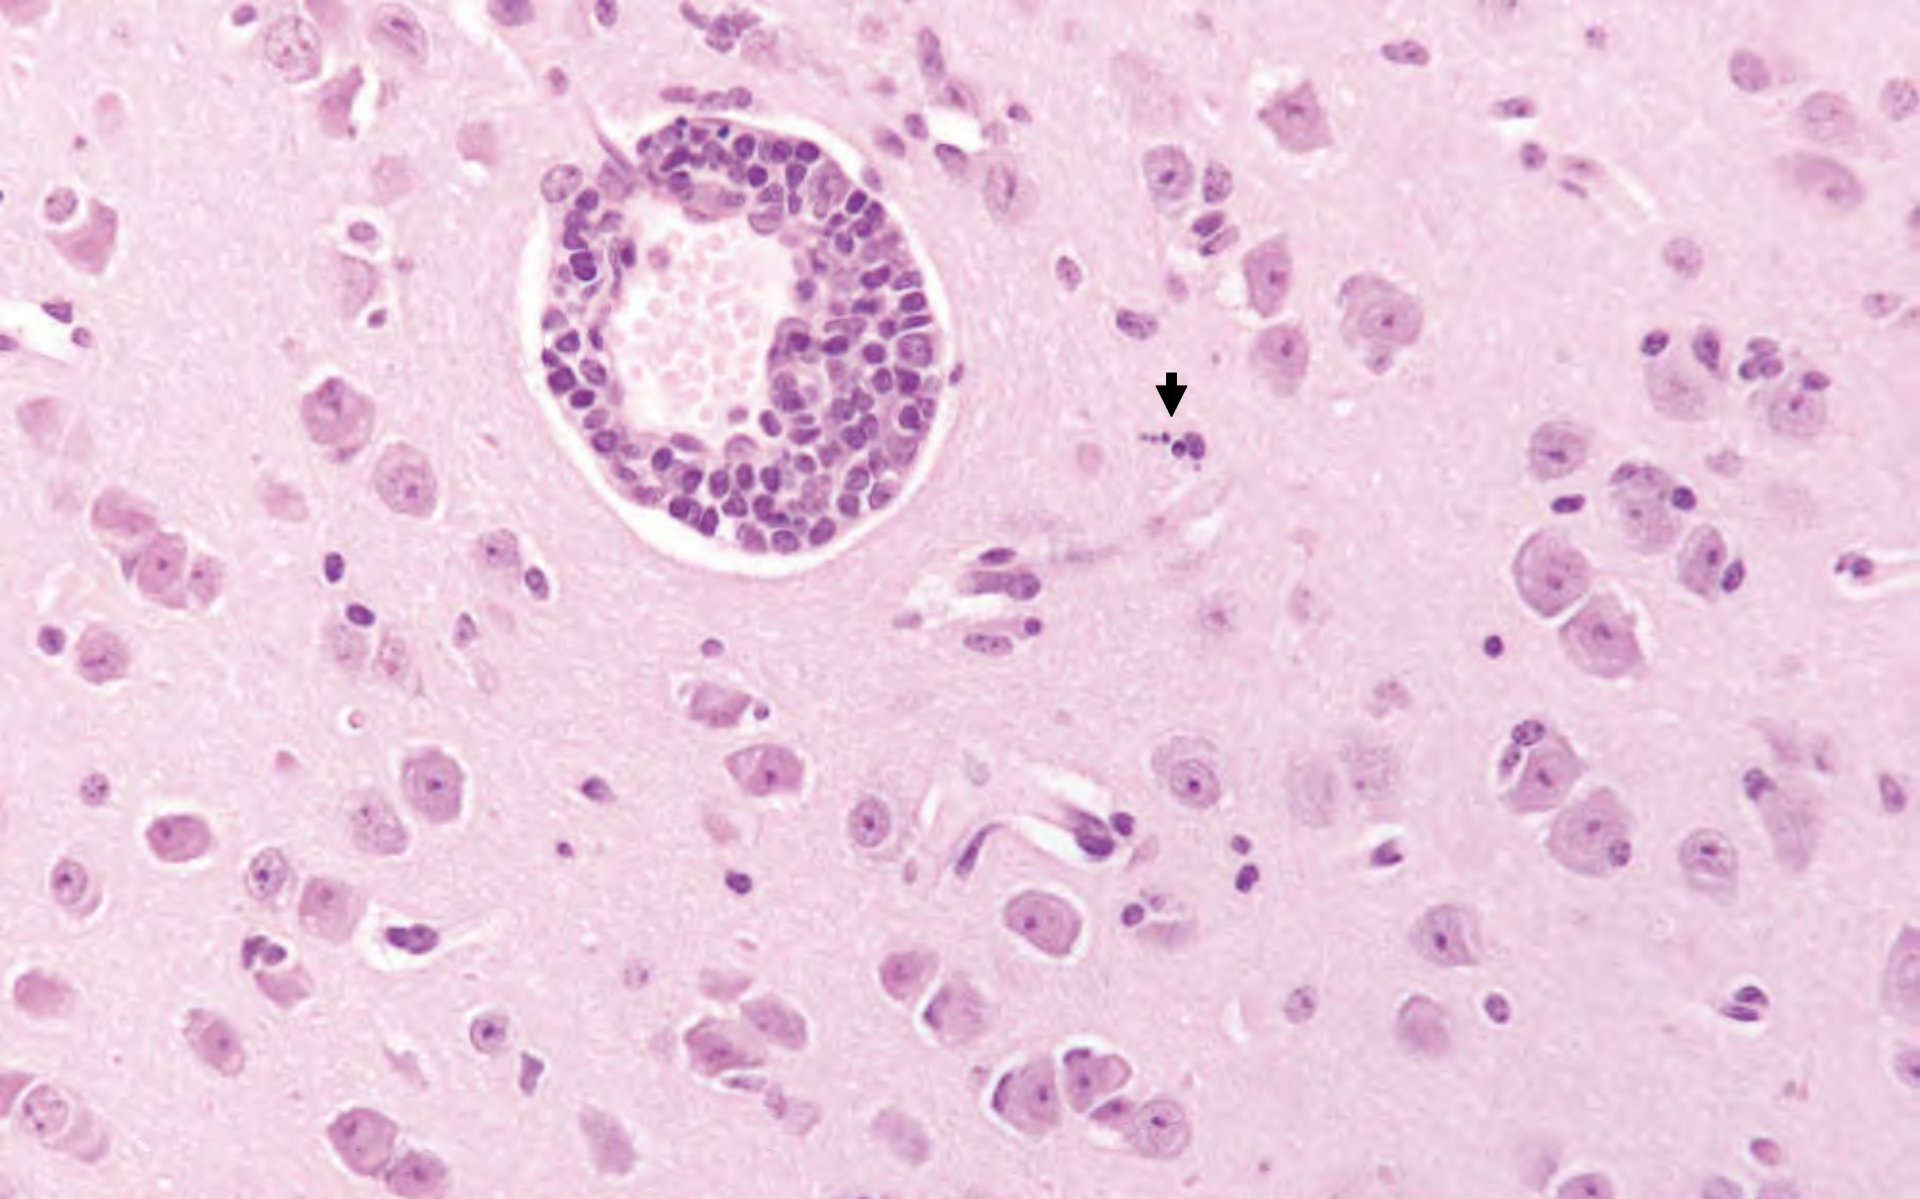

Perivascular infiltration and apoptotic neuron (arrow)



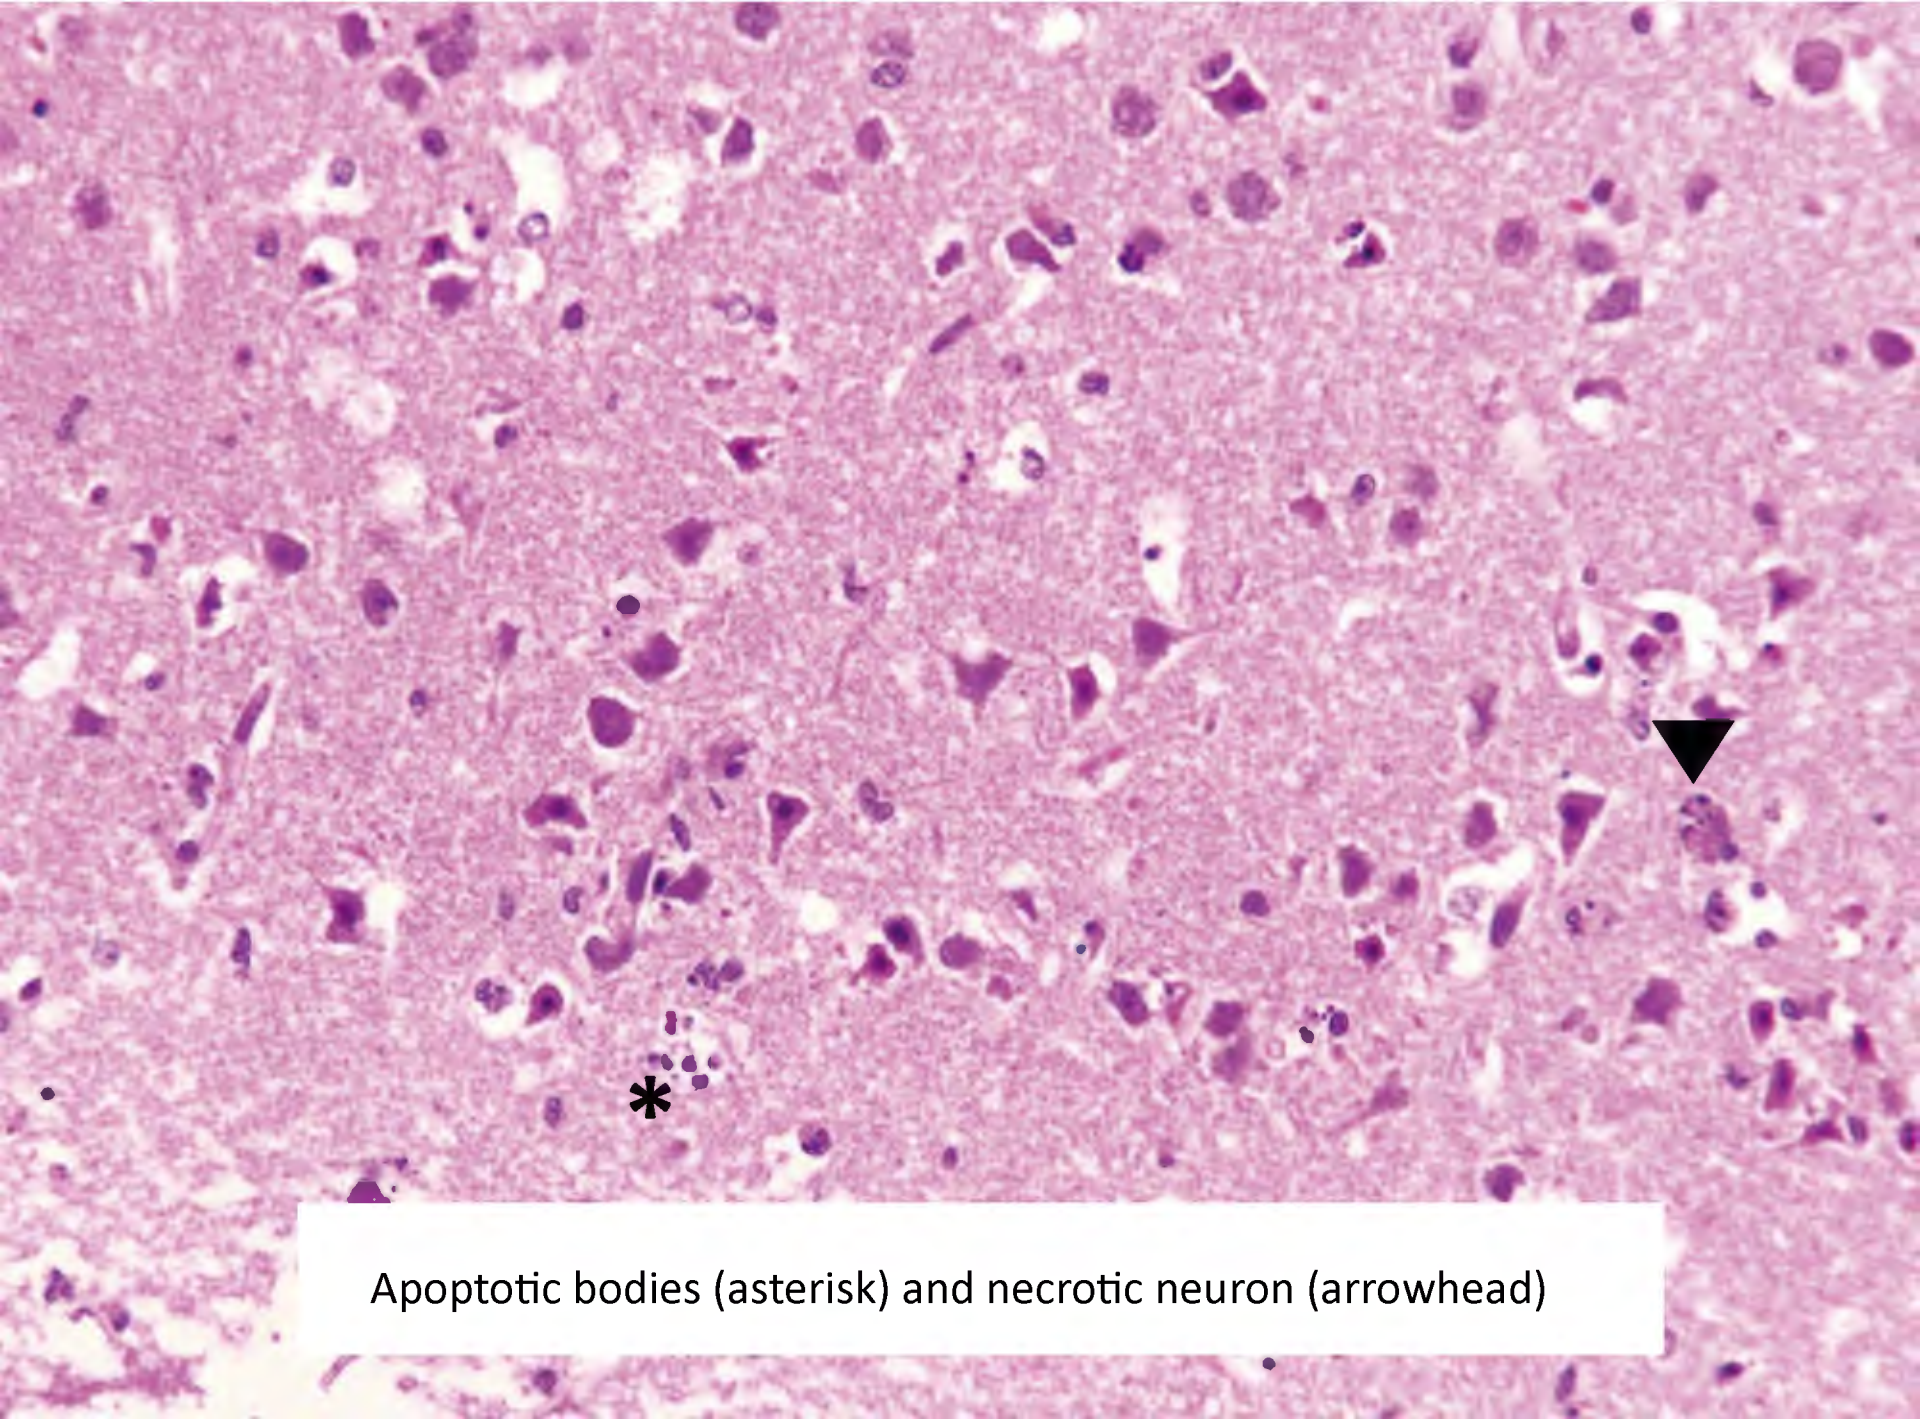

Apoptotic bodies (asterisk) and necrotic neuron (arrowhead)



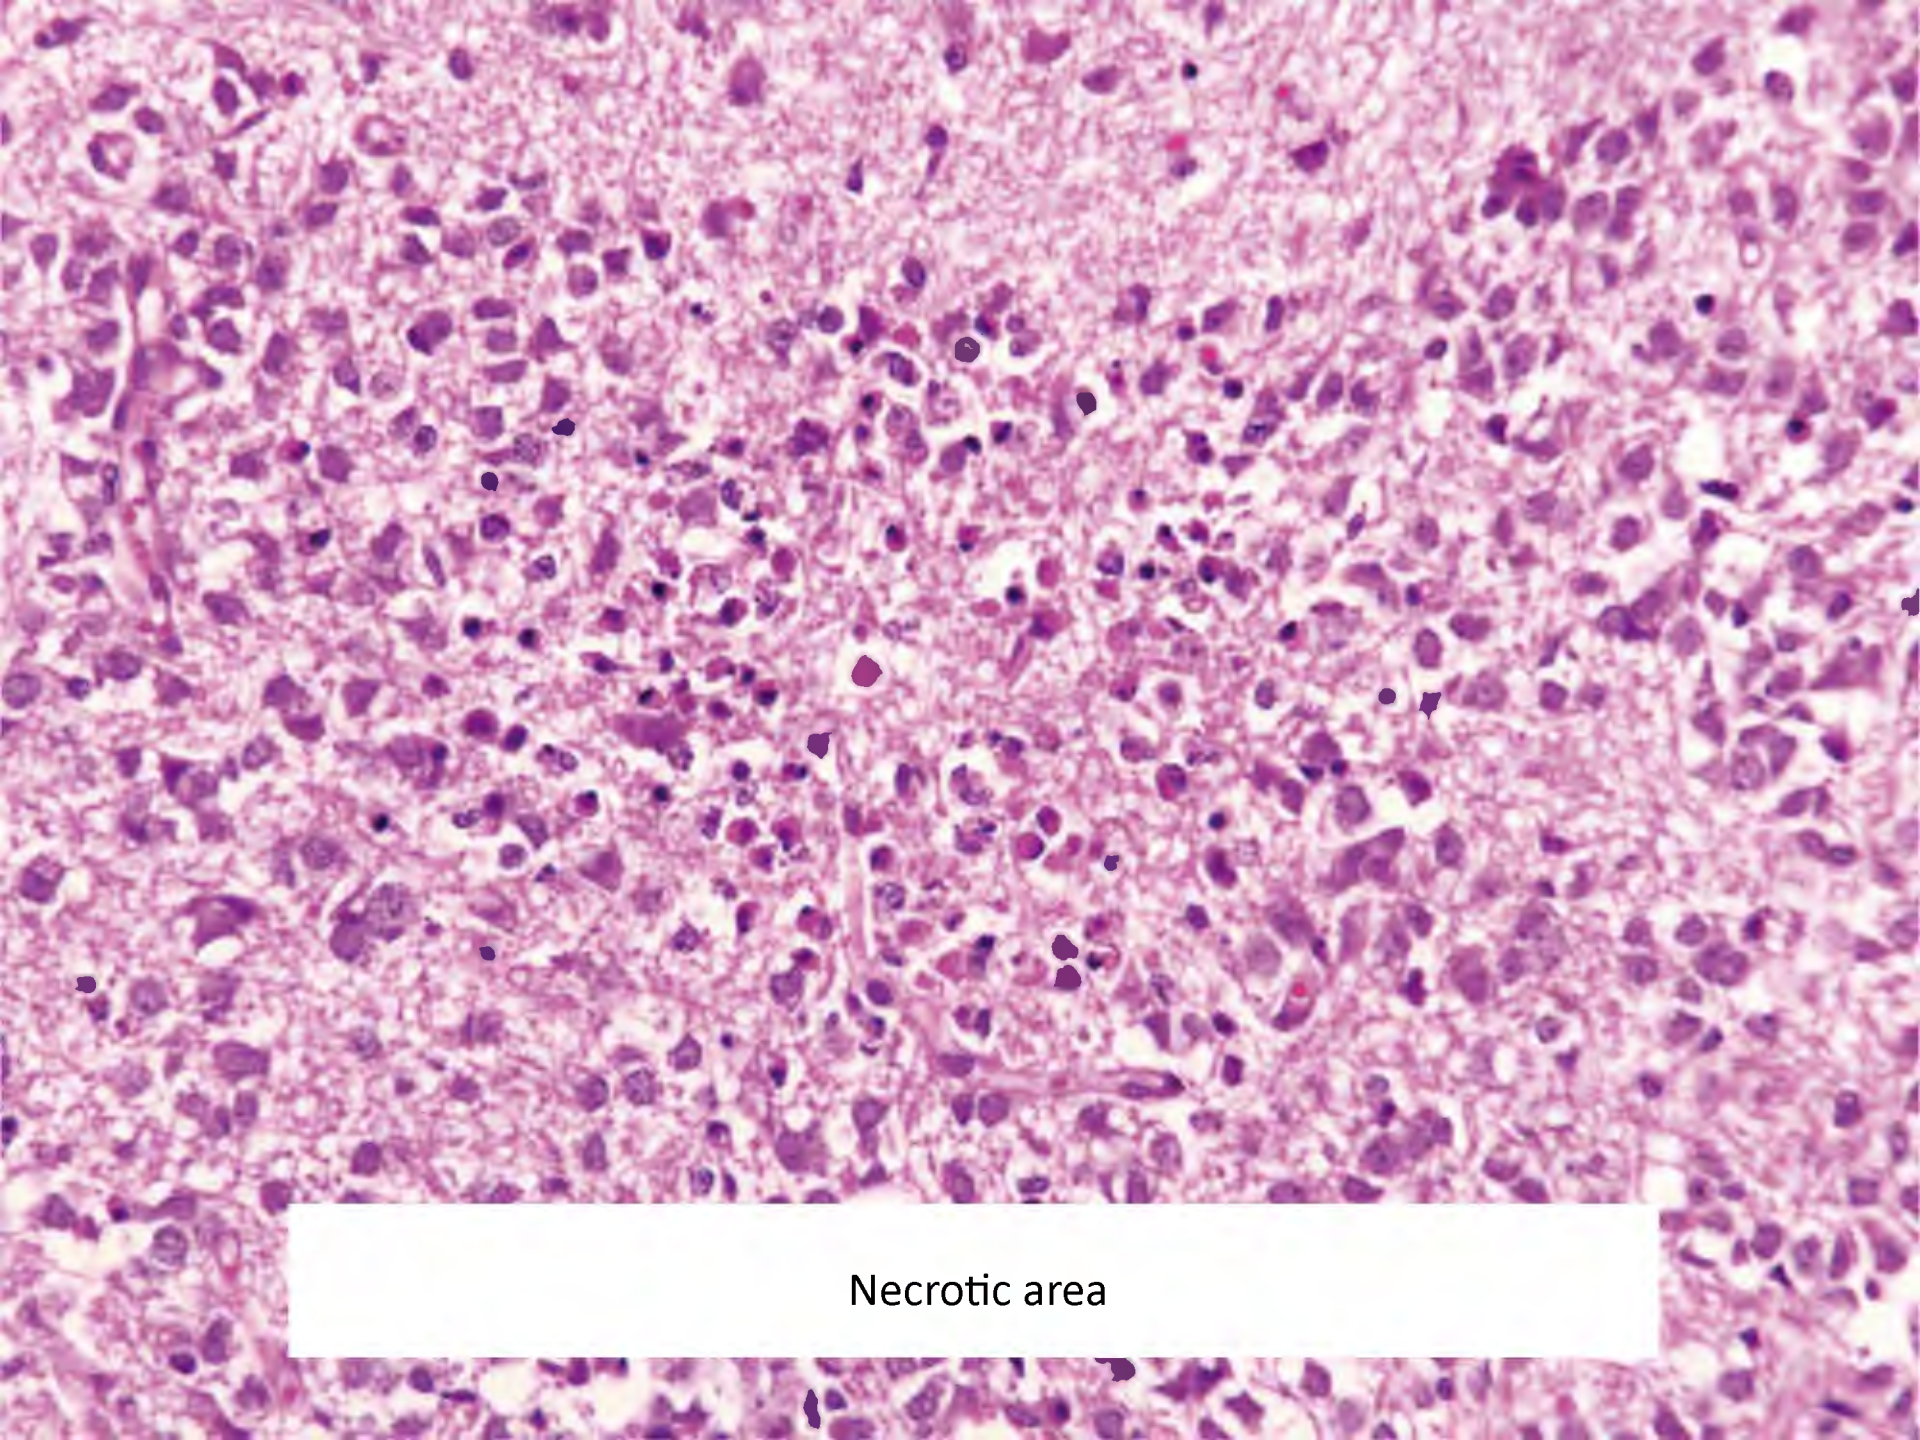

Necrotic area



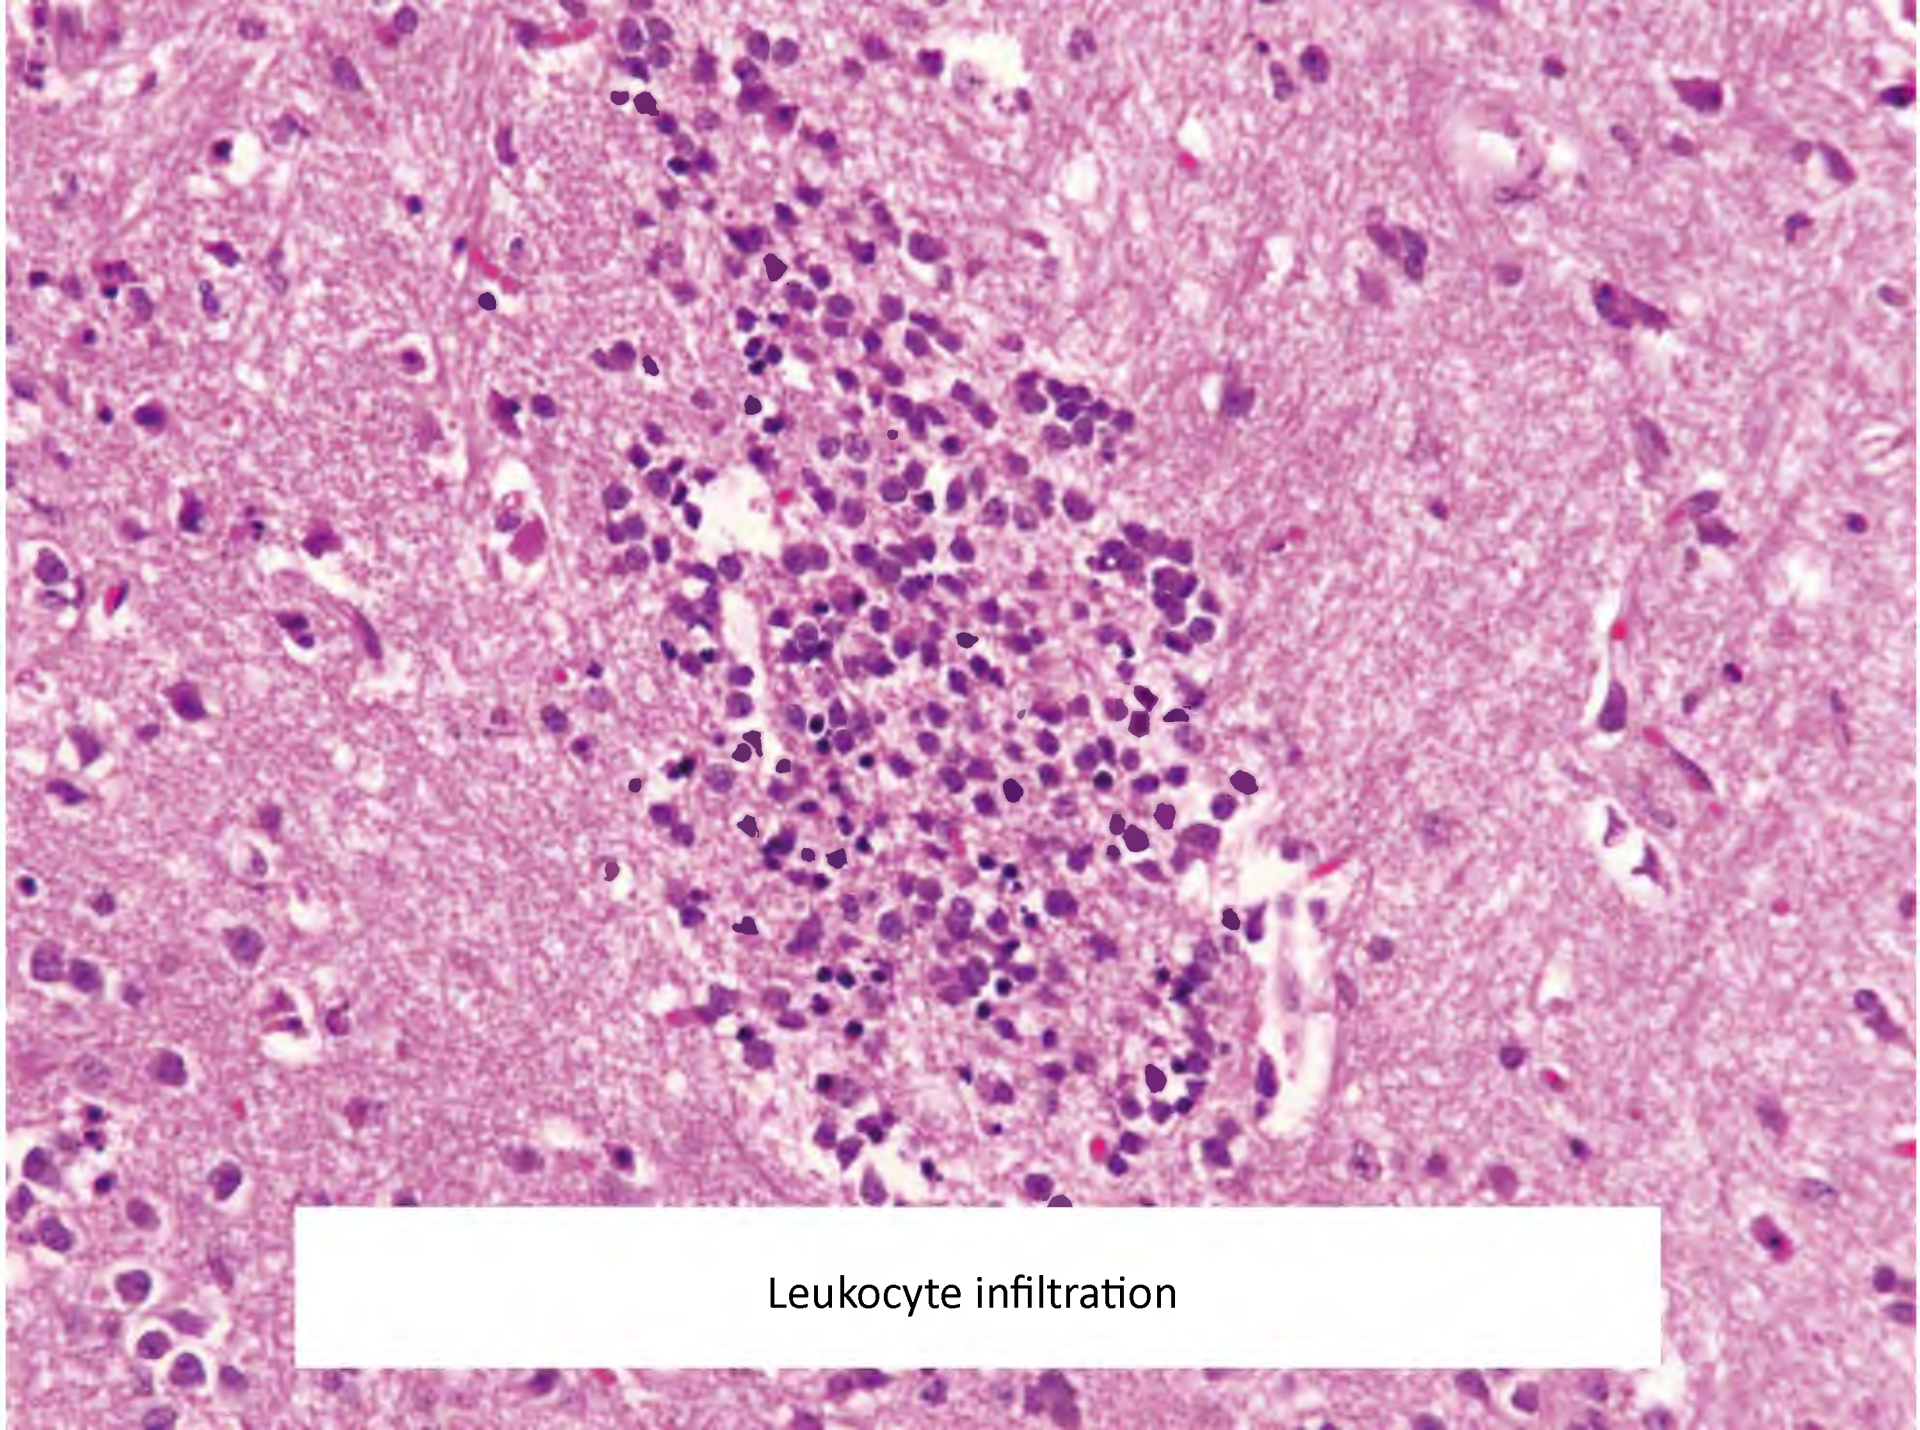

Leukocyte infiltration
