# Supplementary figures and images for: Role of NS1 and TLR3 in Pathogenesis and Immunity of WNV
Source: MDPI journal article supplement (doi:10.3390/v11070603), 2019-07-03

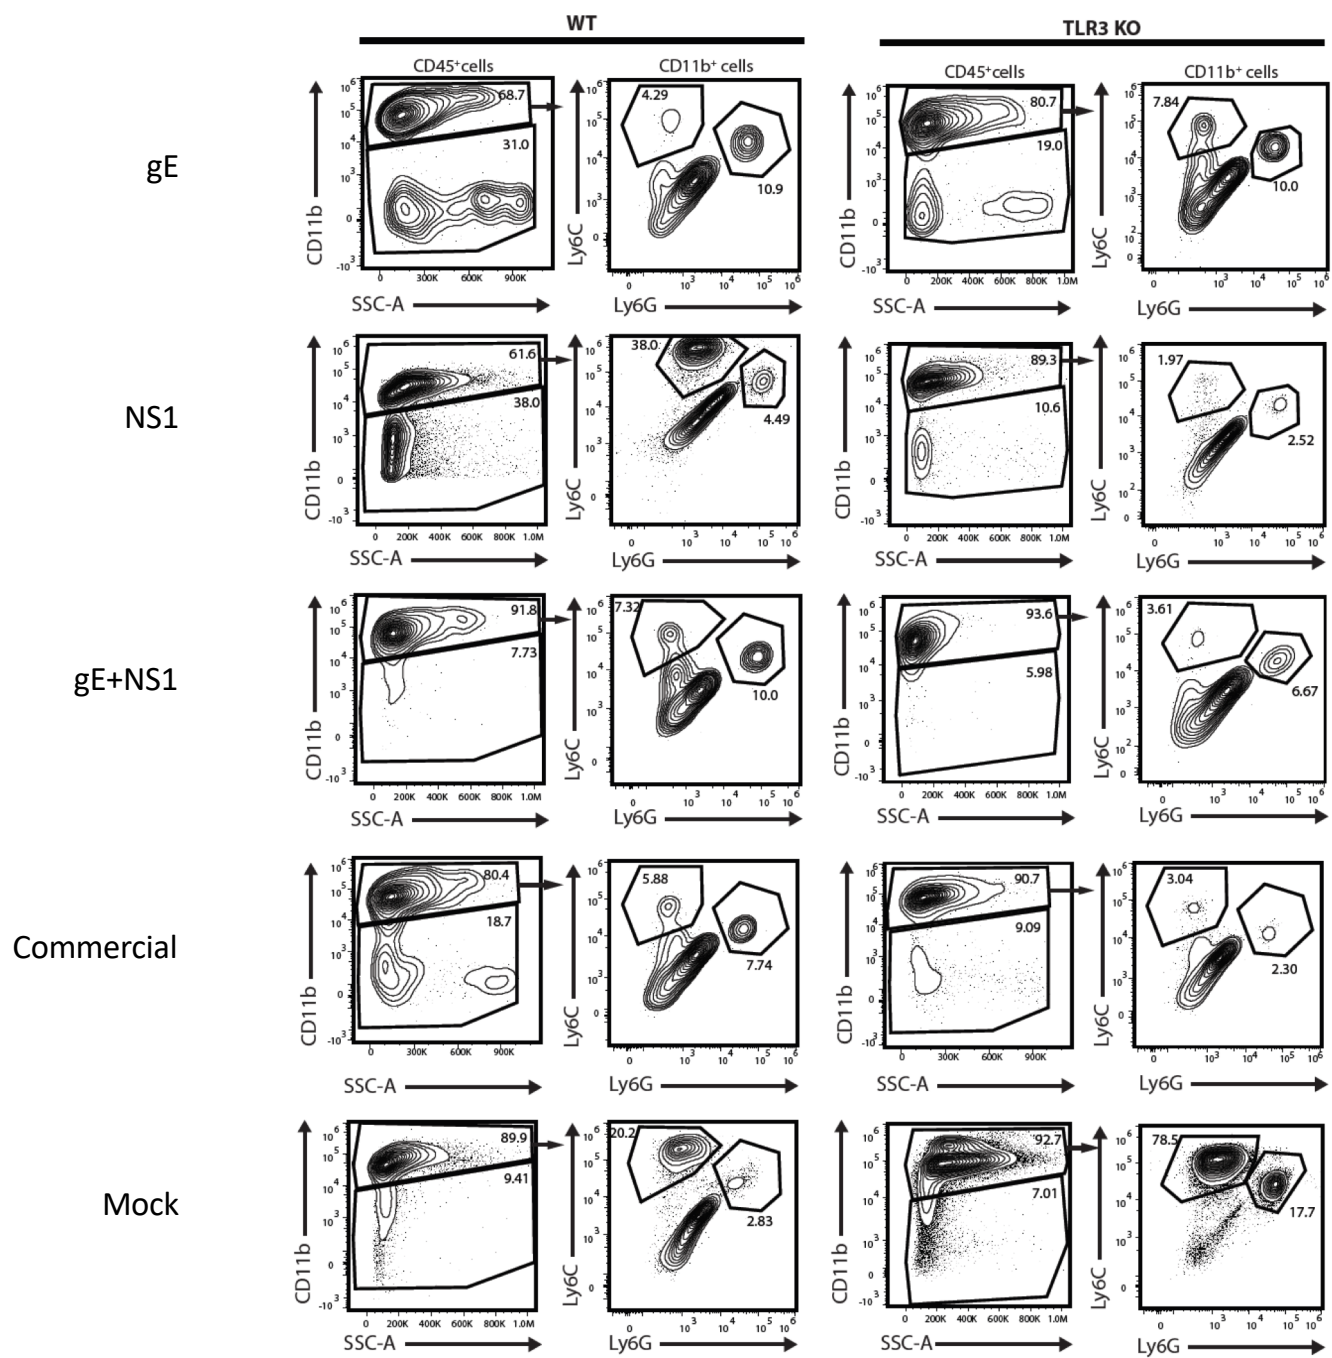

Supplement: s1 [file s1]
